# Supplementary material for: Ultralight hybrid silica aerogels derived from supramolecular hydrogels self-assembled from insoluble nano building blocks
Source: Royal Society of Chemistry journal article supplement (doi:10.1039/d1ra00418b), 2021-01-01
Supplement: d1ra00418b1.pdf [file d1ra00418b1.pdf]

## Supporting Information

### **Ultralight hybrid silica aerogels derived from supramolecular hydrogels self-assembled from insoluble nano building blocks**

*Zongjian Liu,<sup>a</sup> Ling Liu,<sup>b</sup> Zhenggen Zhong,<sup>b</sup> Yuanyuan Ran,<sup>a</sup> Jianing Xi<sup>\*a</sup> and Jin Wang<sup>\*b</sup>*

<sup>a</sup>Department of Rehabilitation, Beijing Rehabilitation Hospital, Capital Medical University, Beijing 100144, P. R. China. E-mail: xijn999@ccmu.edu.cn

<sup>b</sup>Key Laboratory of Multifunctional Nanomaterials and Smart Systems, Suzhou Institute of Nano-Tech and Nano-Bionics, Chinese Academy of Sciences, Suzhou 215123, P. R. China. E-mail: jwang2014@sinano.ac.cn

## Figures of the Supporting Information

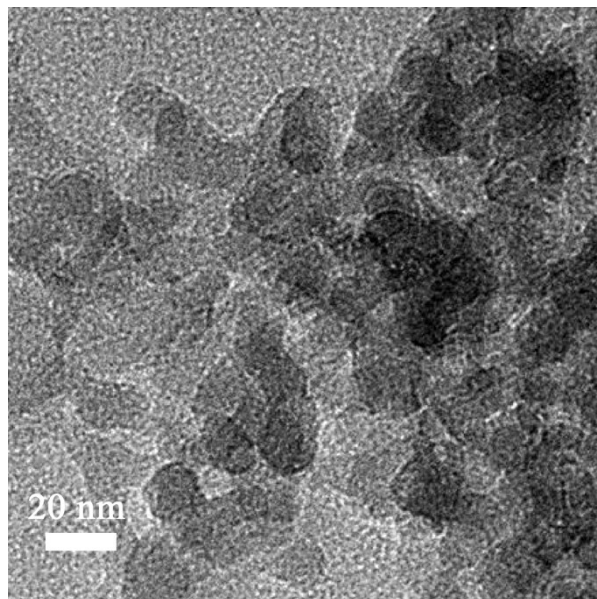

**Figure S1.** TEM image of SiO<sub>2</sub>-NH<sub>2</sub> nanoparticles.

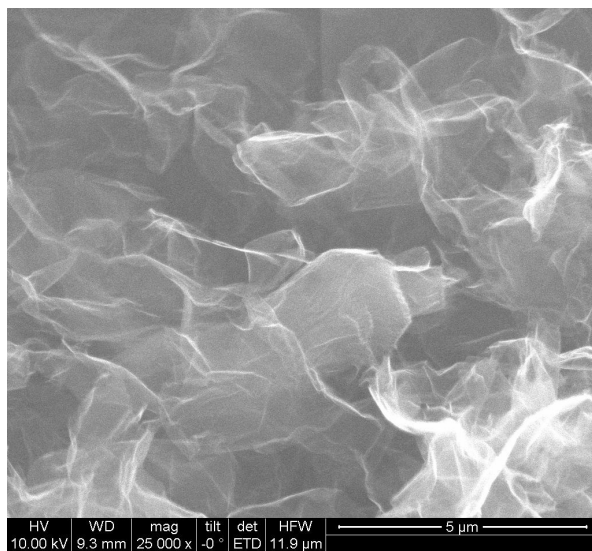

**Figure S2.** SEM image of GO.

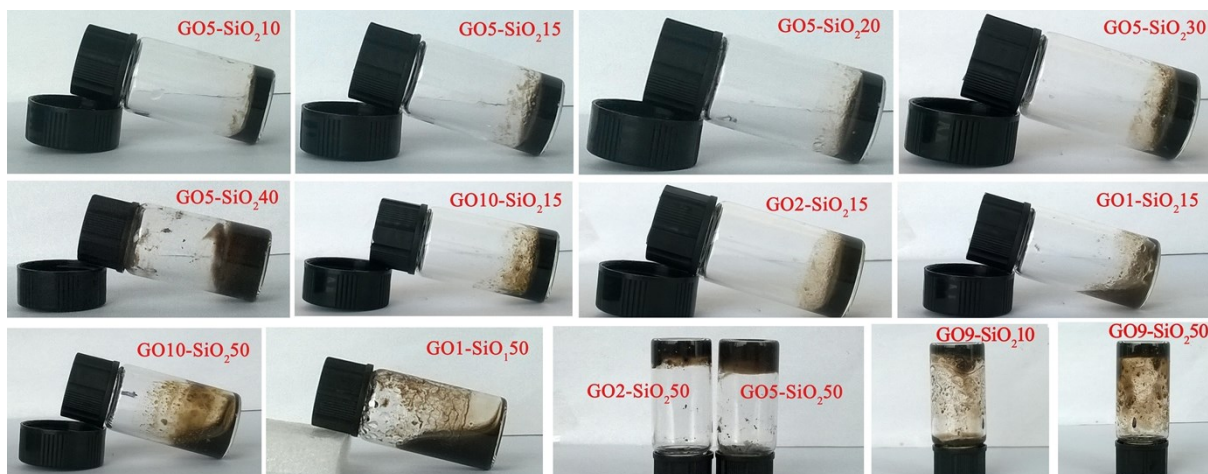

**Figure S3.** Photo images of supramolecular hydrogels as indicated.

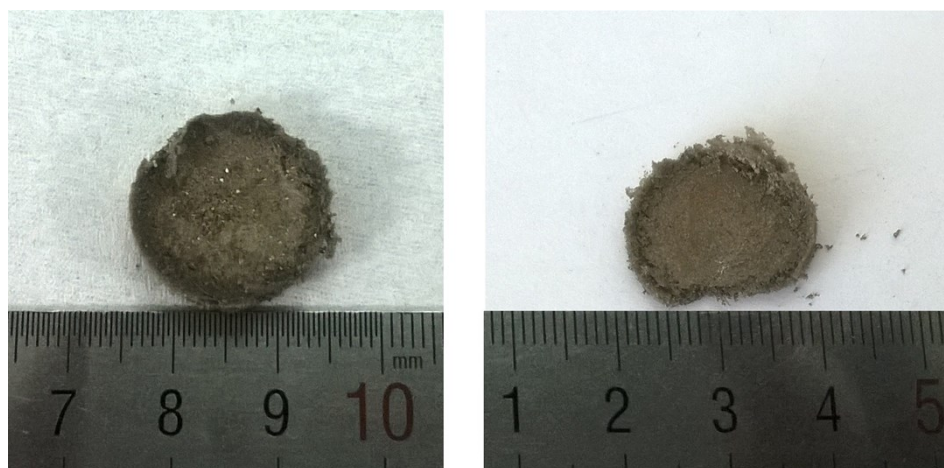

**Figure S4.** Photo images of the hybrid aerogels: Left: GO5-SiO<sub>2</sub>15; right GO5-SiO<sub>2</sub>10.

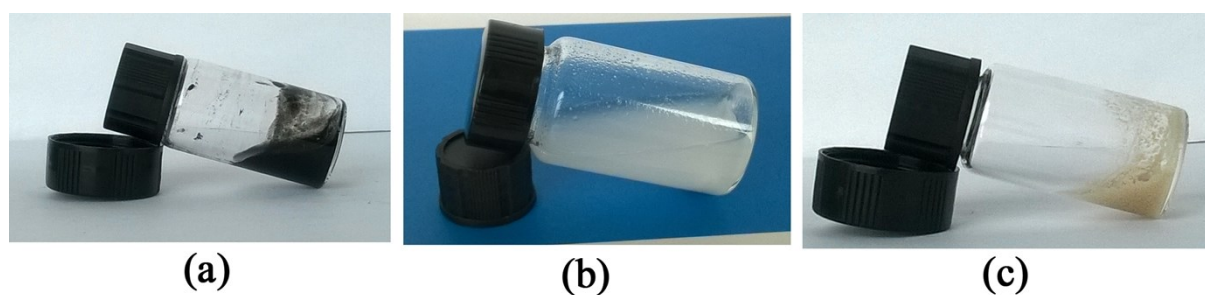

**Figure S5.** Photo images of (a) supramolecular hydrogel (GO5-SiO<sub>2</sub>40) at 90 °C; (b) mixture of SiO<sub>2</sub>-OH (20 mg/ml) and SiO<sub>2</sub>-NH<sub>2</sub> (20 mg/ml); and (c) mixture of SiO<sub>2</sub>-OH (20 mg/ml) and GO (5 mg/ml).
